# Supplementary material
Source: publisher figshare collection journal article supplement (https://acs.figshare.com/ndownloader/files/4086118)
Supplement: Supplementary file 1 [file 4086118]

# **Structure and Reactivity of Homocysteine Radical Cation in the Gas Phase Studied by Ion-Molecule Reactions and Infrared Multiple Photon Dissociation.**

Sandra Osburn<sup>1</sup>, Ticia Burgie<sup>1</sup>, Giel Berden<sup>2</sup>, Jos Oomens<sup>2,3</sup>, Richard A.J. O'Hair<sup>4,5,6</sup>, Victor Ryzhov<sup>1\*</sup>

<sup>1</sup>*Department of Chemistry and Biochemistry, and Center for Biochemical and Biophysical Studies, Northern Illinois University, Dekalb, IL 60115, USA*

<sup>2</sup>*FOM Institute for Plasma Physics Rijnhuizen, Nieuwegein, The Netherlands*

<sup>3</sup>*University of Amsterdam, Amsterdam, The Netherlands*

<sup>4</sup>*School of Chemistry, The University of Melbourne, Melbourne, Victoria 3010, Australia*

<sup>5</sup>*Bio21 Institute of Molecular Science and Biotechnology, The University of Melbourne, Melbourne, Victoria 3010, Australia*

<sup>6</sup>*ARC Centre of Excellence for Free Radical Chemistry and Biotechnology, Melbourne, Victoria 3010, Australia*

## LIST OF FIGURES:

Figure S1: Kinetic log plots of the radical cations of cysteine and homocysteine generated by CID.

Figure S2: Calculated higher energy pathway for the charge transfer from the amine nitrogen to the carboxylate carbon followed by the radical migration from the sulfur to the  $\alpha$ -carbon for the radical cation of homocysteine.

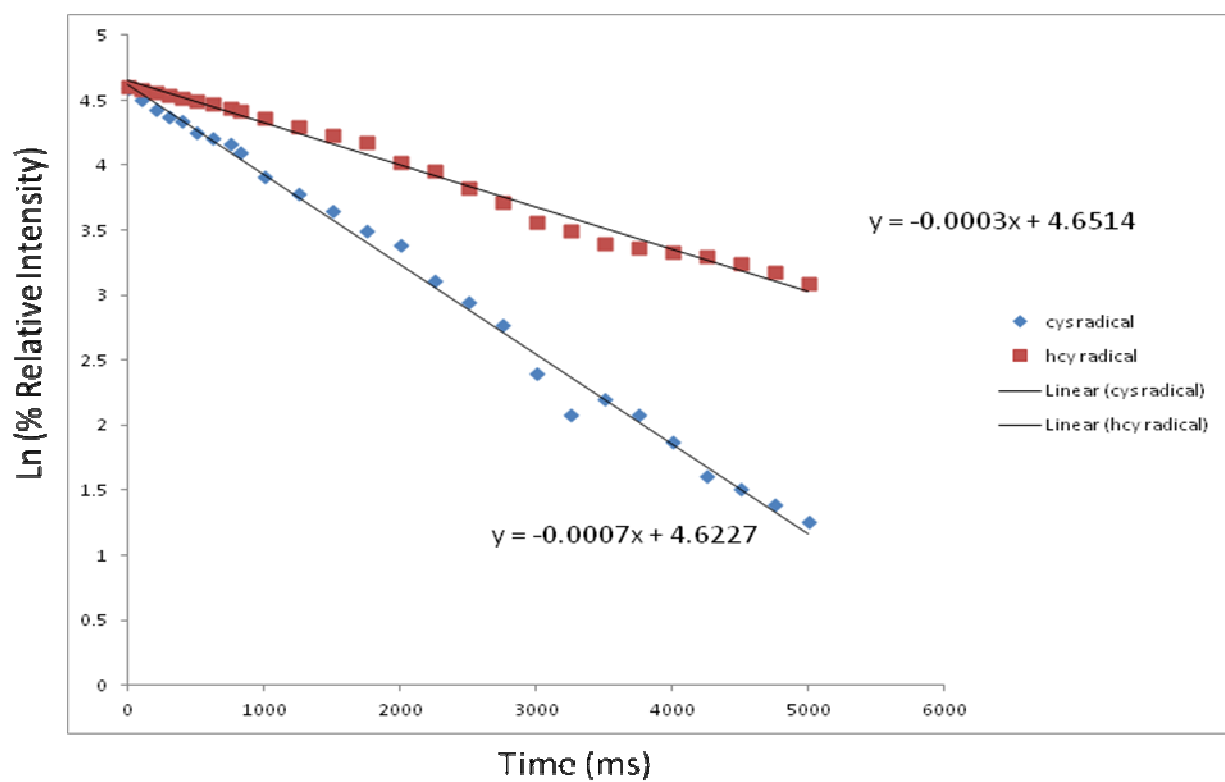

Figure S1.

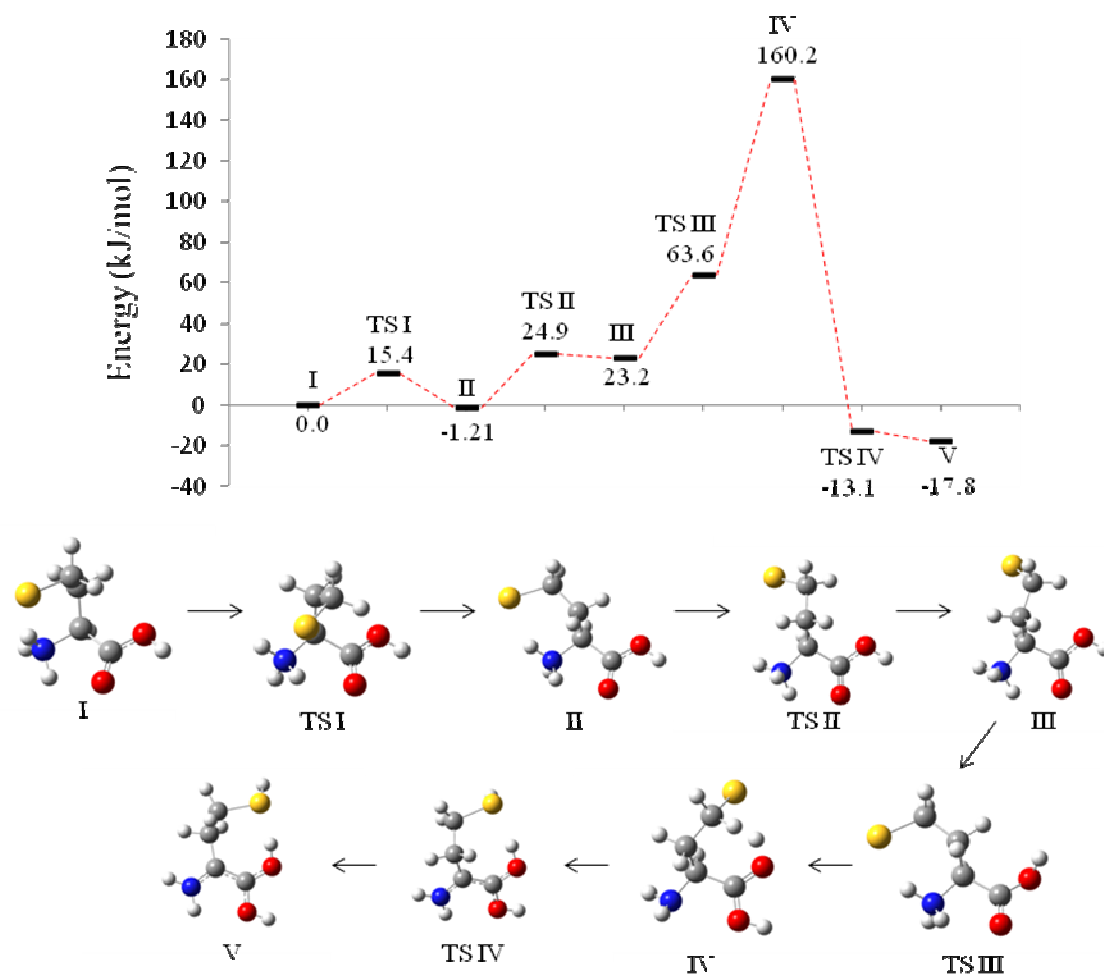

Figure S2.
